# Supplementary material for: Long-Term Exposure to Supraphysiological Levels of Testosterone Impacts Rat Submandibular Gland Proteome
Source: MDPI journal article supplement (doi:10.3390/ijms25010550), 2023-12-31
Supplement: s1 [file s1]

## Supplementary Materials

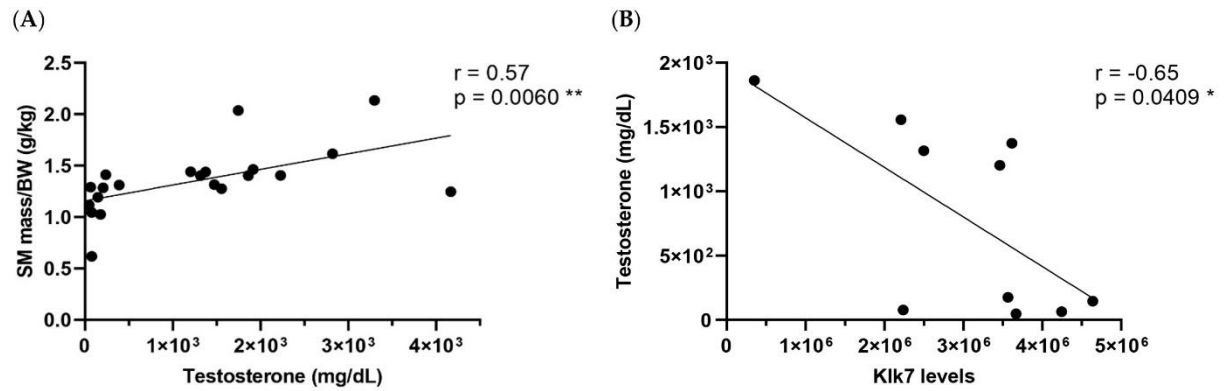

**Figure S1.** Pearson correlations were performed for an in-deep understanding of association between submandibular gland mass-to-body weight and testosterone levels (A), and testosterone and Kik7 (B). (\*  $p < 0.05$ ; \*\*  $p < 0.01$ ).

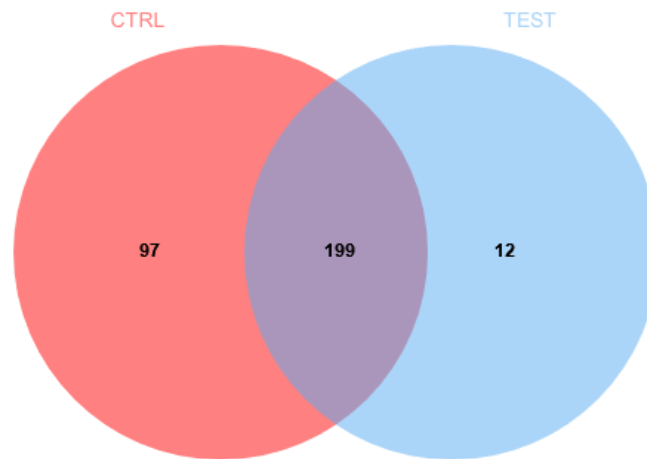

**Figure S2.** Venn diagram illustrating common proteins among CTRL and TEST groups, and exclusive proteins from each group. The represented figure was made with *jvenn* tool ([jvenn.toulouse.inrae.fr](http://jvenn.toulouse.inrae.fr)).

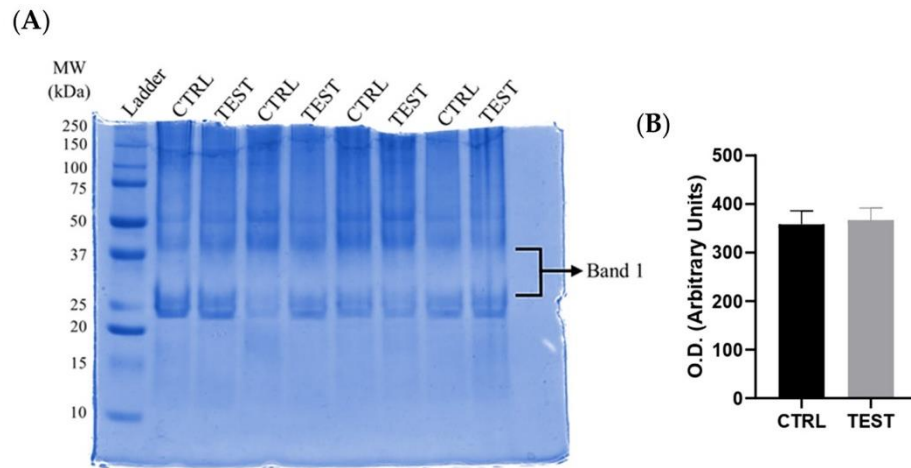

**Figure S3.** Zymography analysis of submandibular gland samples from CTRL and TEST. (A) Representative zymography gel of alternated submandibular gland samples from CTRL group and TEST group. A representative molecular weight standard (ladder) is shown. The band identified with proteolytic activity can be observed in the molecular weight range between  $\approx 25$  kDa and  $\approx 40$  kDa. (B) Optical density measurements of the referred samples obtained from *Image Lab* (O.D. is presented in arbitrary units).

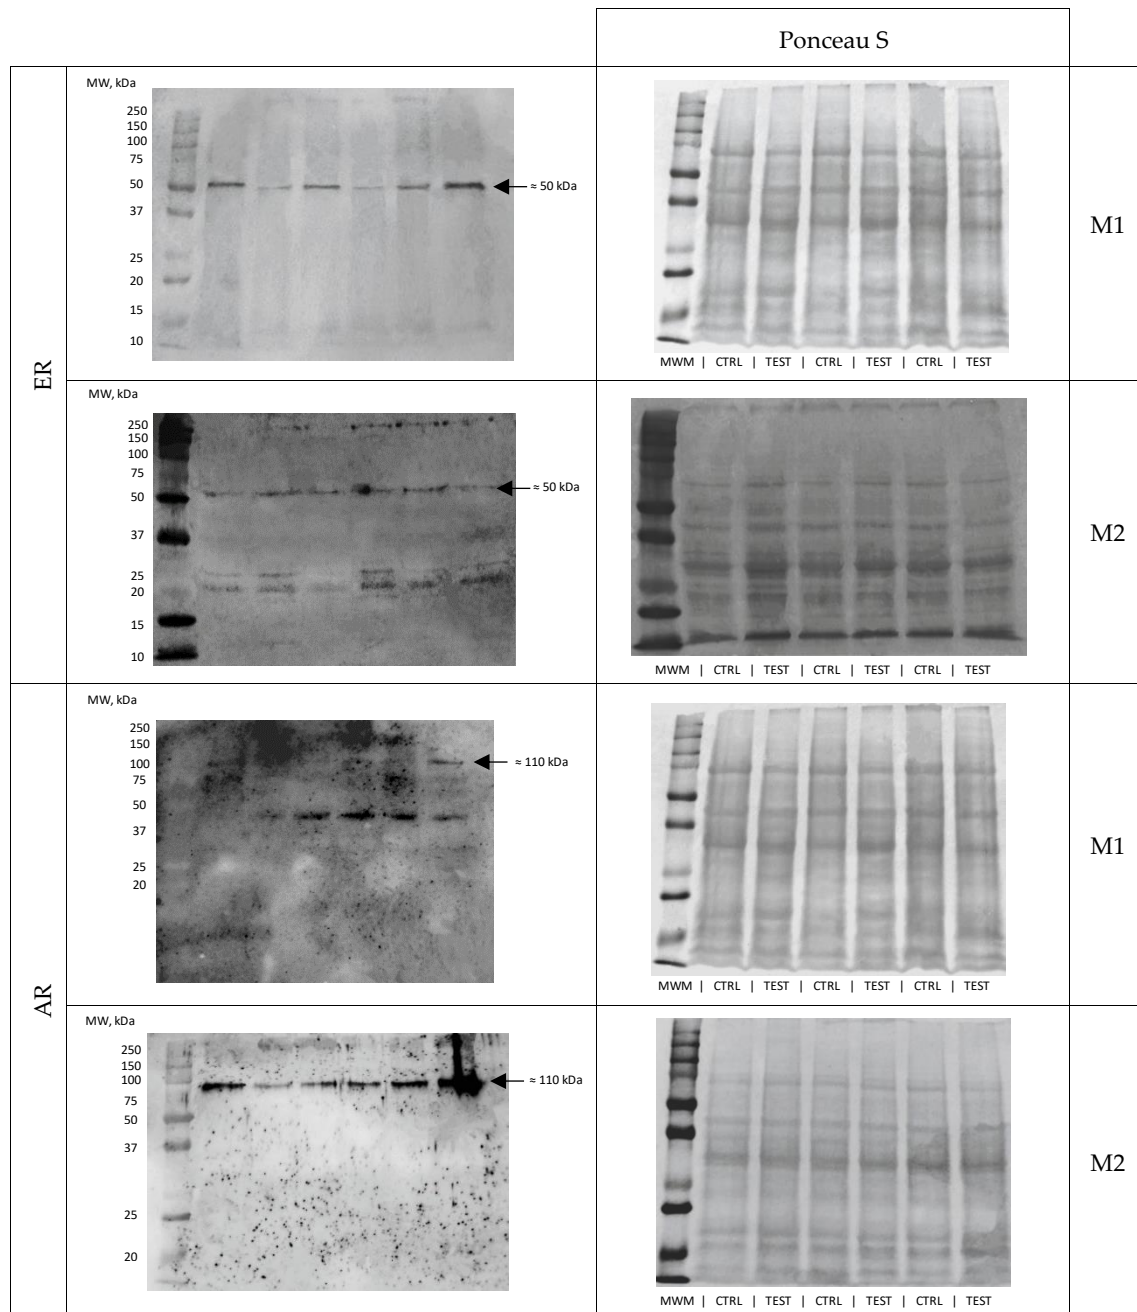

**Figure S4.** Ponceau S-stained nitrocellulose membranes and corresponding immunoblots of the proteins evaluated. MW, Molecular Weight.
