# Supplementary material for: Long-Term Exposure to Supraphysiological Levels of Testosterone Impacts Rat Submandibular Gland Proteome
Source: Int J Mol Sci. 2023 Dec 31;25(1):550. doi: 10.3390/ijms25010550 (PMC10778877; doi:10.3390/ijms25010550)
Supplement: Supplementary file 1 [file ijms-25-00550-s001.zip › Table S1.xlsx]

## Sheet: Table S1
Table S1 – List of proteins identified in the MS analysis of submandibular gland of rats from CTRL and TEST group, with corresponding fold change TEST/CTRL values, the most relevant biological processes of each protein (according to Perseus, UniProt and Gene Ontology), and their reported expression levels in salivary glands (according to PAXdb).
Gene Name	Protein Name	CTRL group	TEST group	Fold change (TEST/CTRL) *	Biological processes/molecular functions, according to Gene Ontology, UniProt and Perseus	Protein expression levels in salivary glands, according to PAXdb (pax-db.org)
Hspe1	10 kDa heat shock protein, mitochondrial	✓			chaperone mediated protein folding	1629 ppm
Ywhae	14-3-3 protein epsilon	✓	✓		regulation of cell division and catalytic activity; protein targeting	1562 ppm
Ywhag	14-3-3 protein gamma	✓	✓		protein targeting; signal transduction; response to insulin stimulus	330 ppm
Ywhaq	14-3-3 protein theta	✓	✓		cell proliferation; negative regulation of ion transport;	722 ppm
Ywhaz	14-3-3 protein zeta/delta	✓	✓	(-) 0.4058	signal transduction; neuronal development; apoptosis	820 ppm
Ogdh	2-oxoglutarate dehydrogenase, mitochondrial	✓	✓		acetyl-CoA metabolic process	33.9 ppm
Hsd17b10	3-hydroxyacyl-CoA dehydrogenase type-2	✓			fatty acid oxidation; lipid metabolism; Leydig cell differentiation	57.4 ppm
Hibadh	3-hydroxyisobutyrate dehydrogenase, mitochondrial	✓	✓	(+) 1.4806	valine metabolism; NADP metabolic process	196 ppm
Acaa2	3-ketoacyl-CoA thiolase, mitochondrial	✓			acetyl-CoA metabolic process; fatty acid metabolism	519 ppm
Rps11	40S ribosomal protein S11	✓			ribosome biogenesis; translation	377 ppm
Rps14	40S ribosomal protein S14	✓	✓		protein synthesis; mRNA binding site formation; cytoplasmic translation	478 ppm
Rps15a	40S ribosomal protein S15a	✓	✓		translation; initiation of protein synthesis from mRNA	192 ppm
Rps16	40S ribosomal protein S16	✓			translation initiation; RNA binding; ribosome assembly and biogenesis	472 ppm
Rps18	40S ribosomal protein S18	✓			translation; ganglioside biosynthetic process; ribosome formation	456 ppm
Rps2	40S ribosomal protein S2	✓			translation initiation; elongation; ribosome biogenesis	151 ppm
Rps20	40S ribosomal protein S20	✓			cytoplasmic translation; RNA binding	1269 ppm
Rps3	40S ribosomal protein S3	✓	✓	(=) 1.0010	translational initiation; repair of damaged DNA	1423 ppm
Rps3a	40S ribosomal protein S3a	✓			ribosome assembly and biogenesis; regulation of mRNA stability	635 ppm
Rps4x	40S ribosomal protein S4	✓	✓		translation; mRNA decoding	493 ppm
Rps5	40S ribosomal protein S5	✓	✓		protein binding; modulation of mRNA translation and stability	83.2 ppm
Rps6	40S ribosomal protein S6	✓	✓		rRNA processing; TOR signalling; response to insulin	826 ppm
Rps8	40S ribosomal protein S8	✓	✓	(=) 0.9652	translational elongation; cell cycle regulation; antigen processing	73.3 ppm
Rpsa	40S ribosomal protein SA	✓	✓		translation; cellular metabolism; RNA processing	988 ppm
Aldh9a1	4-trimethylaminobutyraldehyde dehydrogenase	✓	✓		regulation of osmotic stress; maintenance of cellular homeostasis	522 ppm
Hspd1	60 kDa heat shock protein, mitochondrial	✓	✓		chaperone mediated protein folding	3767 ppm
Rplp0	60S acidic ribosomal protein P0	✓	✓	(=) 0.8901	translation; ribosome assembly	1710 ppm
LOC100362751	60S acidic ribosomal protein P2	✓			translational elongation; cellular proliferation; apoptosis	2252 ppm
Rpl10	60S ribosomal protein L10	✓			translation; negative regulation of transcription by RNA polymerase II	21.4 ppm
Rpl11	60S ribosomal protein L11	✓	✓		translation; cellular response to stress	375 ppm
Rpl12	60S ribosomal protein L12	✓	✓		translation initiation, elongation, and termination	3.24 ppm
Rpl13	60S ribosomal protein L13	✓	✓		translation; ribosome assembly	37.8 ppm
Rpl13a	60S ribosomal protein L13a	✓	✓	(=) 0.7711	translation; response to stimulus; immune response	73.4 ppm
Rpl14	60S ribosomal protein L14	✓			translation; protein folding; mTOR signalling	71.3 ppm
Rpl18	60S ribosomal protein L18	✓	✓	(-) 0.3671	translation; protein synthesis	94.5 ppm
Rpl18a	60S ribosomal protein L18a	✓	✓	(=) 0.7003	translation; regulation of the cell cycle; DNA repair	0 ppm
Rpl19	60S ribosomal protein L19	✓			translation; protein synthesis	31.3 ppm
Rpl4	60S ribosomal protein L4	✓			translation; protein synthesis	545 ppm
Rpl6	60S ribosomal protein L6	✓			translation; protein synthesis	569 ppm
Rpl7	60S ribosomal protein L7	✓	✓		translation; protein synthesis	125 ppm
Rpl7a	60S ribosomal protein L7a	✓	✓		translation; protein synthesis	25.8 ppm
Hspa5	78 kDa glucose-regulated protein	✓	✓	(-) 0.5419	chaperone mediated protein folding	11099 ppm
Acat1	Acetyl-CoA acetyltransferase, mitochondrial	✓	✓	(=) 0.9375	acetyl-CoA metabolic process	2350 ppm
Acss1	Acetyl-coenzyme A synthetase	✓			acetyl-CoA metabolic process	213 ppm
Aco2	Aconitate hydratase, mitochondrial	✓	✓		acetyl-CoA metabolic process	3420 ppm
Acta2	Actin, aortic smooth muscle	✓	✓	(+) 1.9637	muscle adaptation; tissue morphogenesis	6115 ppm
Actb	Actin, cytoplasmic 1	✓	✓	(+) 1.6607	cell migration, division, and adhesion	0 ppm
Actg1	Actin, cytoplasmic 2	✓	✓	(+) 1.3210	cell motility and contraction; response to calcium ion	42.9 ppm
Actg2	Actin, gamma-enteric smooth muscle;	✓	✓	(-) 0.4491	cardiac muscle contraction; intracellular signalling;	Data not found
Ahcy	Adenosylhomocysteinase	✓	✓	(-) 0.6550	amino acid methionine metabolism	254 ppm
Cap1	Adenylyl cyclase-associated protein 1	✓			regulation of actin cytoskeleton dynamics; endocytosis; signal transduction	1255 ppm
Slc25a5	ADP/ATP translocase 2	✓	✓	(-) 0.6309	ATP and ADP transport; energy metabolism; calcium homeostasis	3188 ppm
Arf2	ADP-ribosylation factor 2	✓			vesicle-mediated transport; cytoskeletal organization	62.5 ppm
Arf4	ADP-ribosylation factor 4	✓	✓		vesicle-mediated transport; cytoskeletal organization	72.4 ppm
Arl8b	ADP-ribosylation factor-like protein 8B	✓			lysosomal trafficking and autophagy	0 ppm
Aldh1a1	Aldehyde dehydrogenase 1 family, member a1	✓			metabolism; neurological system process; apoptosis	204 ppm
Abhd14b	Alpha/beta hydrolase domain-containing protein 14B	✓	✓		lipid metabolism	1156 ppm
Pzp	Alpha-1-macroglobulin	✓			protease inhibition, anti-inflammatory responses; reproductive process	785 ppm
Ahsg	Alpha-2-HS-glycoprotein	✓			vesicle-mediated transport; response to stress; insulin resistance	62 ppm
A2ml1	Alpha-2-macroglobulin-like 1	✓	✓		negative regulation of peptidase activity; immune response	4521 ppm
Actn1	Alpha-actinin-1	✓			muscle cell development; calcium ion binding	549 ppm
Actn4	Alpha-actinin-4	✓	✓		assembly of the cytoskeleton; cell adhesion and migration; transport	1678 ppm
Aldh7a1	Alpha-aminoadipic semialdehyde dehydrogenase	✓	✓		metabolism; protein binding	293 ppm
Amy1a	Alpha-amylase	✓			metabolism; digestion; calcium ion binding	6.96 ppm
Eno1	Alpha-enolase	✓	✓	(=) 0.7800	glycolysis; tissue regeneration; cell migration	9332 ppm
Man2b1	Alpha-mannosidase	✓			metal ion binding; protein folding and glycosylation	94.2 ppm
Napa	Alpha-soluble NSF attachment protein	✓			intracellular protein transport; synaptic transmission	178 ppm
Anpep	Aminopeptidase N		✓		protein digestion; amino acid metabolism; signal transduction	194 ppm
Anxa1	Annexin A1	✓	✓	(=) 1.015	inflammation; cell proliferation; apoptosis	1139 ppm
Anxa2	Annexin A2	✓			cell growth and migration; endocytosis; exocytosis; inflammation	971 ppm
Anxa3	Annexin A3	✓			inflammation; apoptosis; cell membrane repair	253 ppm
Anxa4	Annexin A4	✓	✓		cellular signalling; membrane trafficking; ion channel regulation	481 ppm
Anxa5	Annexin A5	✓			inflammation; membrane trafficking	1739 ppm
Anxa6	Annexin A6	✓	✓		lipid metabolism; protein trafficking; signal transduction	3507 ppm
Agr2	Anterior gradient 2, protein disulphide isomerase family member	✓	✓		protein folding; transport; calcium homeostasis	446 ppm
Nars	asparaginyl-tRNA synthetase	✓			translation; metabolism; peptide and amide biosynthetic	260 ppm
Got1	Aspartate aminotransferase, cytoplasmic	✓	✓		response to metal ion; metabolism	481 ppm
Got2	Aspartate aminotransferase, mitochondrial	✓	✓		response to metal ion; metabolism	1539 ppm
Atp5a1	ATP synthase subunit alpha, mitochondrial	✓	✓	(-) 0.5626	ATP biosynthetic and metabolic process; transport	2530 ppm
Atp5b	ATP synthase subunit beta, mitochondrial	✓	✓	(+) 1.6665	ATP biosynthetic and metabolic process; transport	5796 ppm
Atp5d	ATP synthase subunit delta, mitochondrial	✓	✓		ATP biosynthetic and metabolic process; transport	3.5 ppm
Atp5c1	ATP synthase subunit gamma, mitochondrial	✓	✓		ATP biosynthetic and metabolic process; transport	1148 ppm
Acly	ATP-citrate synthase	✓			acetyl-CoA metabolic process; fatty acid metabolism	1933 ppm
Manba	Beta-mannosidase	✓	✓		carbohydrate metabolism	13.3 ppm
Atic	Bifunctional purine biosynthesis protein PURH	✓	✓		nucleotide metabolic process; regeneration	172 ppm
Gne	Bifunctional UDP-N-acetylglucosamine 2-epimerase/N-acetylmannosamine kinase	✓			carboxylic acid biosynthetic process; metabolism	1472 ppm
Bpifa2f	BPI fold containing family A, member 2F	✓	✓		defense and stress response	Data not found
Bpifa2	BPI fold-containing family A member 2	✓			defense and stress response	67.8 ppm
Bcat2	Branched-chain-amino-acid aminotransferase, mitochondrial	✓	✓	(=) 1.1953	gland development; branched-chain amino acid metabolism	959 ppm
Calr	Calreticulin	✓	✓	(-) 0.6349	translation; protein stabilization	13041 ppm
Car2	Carbonic anhydrase 2	✓			response to inorganic substance; bicarbonate transport	3764 ppm
Car6	Carbonic anhydrase 6	✓	✓	(=) 0.8618	response to inorganic substance; bicarbonate transport	2211 ppm
Cbr1	Carbonyl reductase [NADPH] 1	✓			fatty acid metabolism	362 ppm
Cmbl	Carboxymethylenebutenolidase homolog		✓		lipid metabolism	73 ppm
Cpq	Carboxypeptidase Q	✓	✓		protein metabolism; peptide and collagen catabolism	32.7 ppm
Cp	Ceruloplasmin	✓	✓		iron metabolism; antioxidant defense; angiogenesis; wound healing	101 ppm
Cs	Citrate synthase, mitochondrial	✓	✓		acetyl-CoA metabolic process	333 ppm
Cltc	Clathrin heavy chain	✓	✓		intracellular transport	2799 ppm
Copa	Coatomer subunit alpha	✓			endoplasmic reticulum to Golgi vesicle-mediated transport	1203 ppm
Copb2	Coatomer subunit beta	✓	✓		endoplasmic reticulum to Golgi vesicle-mediated transport	1203 ppm
Arcn1	Coatomer subunit delta	✓	✓		endoplasmic reticulum to Golgi vesicle-mediated transport	1353 ppm
Cfl1	Cofilin-1	✓	✓		response to oxidative stress	1435 ppm
Chchd3	Coiled-coil-helix-coiled-coil-helix domain-containing protein 3	✓	✓		mitochondrial bioenergetics and protein import regulation	195 ppm
Col1a1	Collagen alpha-1(I) chain	✓	✓		response to oxidative stress; protein complex oligomerization	0.532 ppm
Col6a3	Collagen type VI alpha 3 chain	✓	✓		extracellular matrix organization; cell adhesion	458 ppm
Col4a2	Collagen, type IV, alpha 2	✓			extracellular matrix organization; cell differentiation	2.87 ppm
Col6a1	Collagen, type VI, alpha 1	✓	✓		extracellular matrix organization; cell differentiation	50.4 ppm
Col6a2	Collagen, type VI, alpha 2	✓	✓		extracellular matrix organization; cell differentiation	19.6 ppm
Csap1	Common salivary protein 1	✓	✓	(-) 0.1247	cell proliferation and migration; saliva secretion; taste perception	Data not found
C3	Complement component 3	✓	✓		fatty acid metabolic process; humoral immune response regulation	640 ppm
Ckmt1b	Creatine kinase, mitochondrial 1B	✓	✓		regulation of mitochondrial function; phosphorylation; apoptosis	Data not found
Uqcrc1	Cytochrome b-c1 complex subunit 1, mitochondrial	✓	✓		oxidative phosphorylation; ATP synthesis coupled electron transport	173 ppm
Uqcrc2	Cytochrome b-c1 complex subunit 2, mitochondrial	✓	✓	(=) 1.1258	metabolic process; oxidation-reduction process	907 ppm
Cox4i1	Cytochrome c oxidase subunit 4 isoform 1, mitochondrial		✓		response to nutrient; ATP production; ROS generation	1608 ppm
Lap3	Cytosol aminopeptidase	✓			protein metabolism; cell cycle regulation; autophagy	545 ppm
Phgdh	D-3-phosphoglycerate dehydrogenase	✓			serine family amino acid biosynthetic; neurogenesis	835 ppm
Dguok	Deoxyguanosine kinase	✓			deoxyguanosine phosphorylation; nucleotides metabolism	26.3 ppm
Dsc2	Desmocollin 2	✓	✓		cell adhesion; tissue development; protein binding	9.13 ppm
Dsp	Desmoplakin	✓			cell growth and differentiation; skin development	924 ppm
Dstn	Destrin	✓	✓	(=) 0.8504	actin-binding, depolymerization and fragmentation	2556 ppm
Dld	Dihydrolipoyl dehydrogenase, mitochondrial	✓	✓	(=) 0.9806	acetyl-CoA biosynthetic process from pyruvate; proteolysis	1177 ppm
Dlat	Dihydrolipoyl transacetylase	✓	✓		acetyl-CoA biosynthetic process from pyruvate; proteolysis	626 ppm
Dpysl2	Dihydropyrimidinase-related protein 2	✓			nervous system and neuron development; response to axon injury	64 ppm
Ddost	Dolichyl-diphosphooligosaccharide--protein glycosyltransferase 48 kDa subunit		✓		glycosylation; protein folding	516 ppm
Rpn1	Dolichyl-diphosphooligosaccharide--protein glycosyltransferase subunit 1	✓	✓	(=) 0.7284	glycosylation; protein folding; transport	1658 ppm
Rpn2	Dolichyl-diphosphooligosaccharide--protein glycosyltransferase subunit 2	✓			glycosylation; metabolism	161 ppm
Etfa	Electron transfer flavoprotein subunit alpha, mitochondrial	✓	✓	(-) 0.6436	fatty acid oxidation; electron transport chain; amino acid metabolism	2301 ppm
Etfb	Electron transfer flavoprotein subunit beta	✓	✓	(=) 1.2371	fatty acid beta-oxidation; amino acid and cholesterol metabolism	1953 ppm
Etfdh	Electron transfer flavoprotein-ubiquinone oxidoreductase, mitochondrial	✓			oxidative phosphorylation; electron transport chain	806 ppm
Eef1g	Elongation factor 1-gamma	✓	✓	(-) 0.3808	protein synthesis; actin filament organization; apoptosis	771 ppm
Eef2	Elongation factor 2	✓	✓	(=) 1.0003	biosynthetic process; cell differentiation	6868 ppm
Erp29	Endoplasmic reticulum resident protein 29	✓			protein folding; lipid metabolism	348 ppm
Ergic1	Endoplasmic reticulum-Golgi intermediate compartment 1	✓			protein sorting; glycosylation; lipid metabolism; vesicle-mediated transport	223 ppm
Hsp90b1	Endoplasmin	✓	✓	(=) 0.8728	chaperone mediated protein folding	3825 ppm
EGF	Epidermal growth factor	✓	✓		protein secretion and transport; calcium ion import; DNA biosynthesis	0 ppm
Erlin2	Erlin-2	✓			maintenance of the endoplasmic reticulum structure; lipid metabolism	260 ppm
Eif4a1	Eukaryotic initiation factor 4A-I	✓	✓		translation; protein synthesis	1321 ppm
Eef1a1	Eukaryotic translation elongation factor 1-alpha 1	✓	✓	(=) 0.8430	response to endogenous and epidermal growth factor stimulus	9650 ppm
Eif2a	Eukaryotic translation initiation factor 2A	✓			translation; protein phosphorylation	83.5 ppm
Eif3l	Eukaryotic translation initiation factor 3 subunit L	✓	✓		cell translation; assembly	339 ppm
Flna	Filamin A, alpha	✓			actin crosslink formation; cell migration and adhesion; signal transduction	1437 ppm
Flnb	Filamin, beta	✓	✓		actin cytoskeleton organization; cell differentiation	1985 ppm
Aldoa	Fructose-bisphosphate aldolase A	✓	✓		pyruvate metabolic process; glycolysis; response to estrogen	1188 ppm
Fh	Fumarate hydratase, mitochondrial	✓	✓		acetyl-CoA metabolic process	591 ppm
Uso1	General vesicular transport factor p115	✓	✓		vesicle transport; Golgi organization; intracellular protein trafficking	2156 ppm
Klk10	Glandular kallikrein-10;	✓	✓	(=) 0.9312	inflammatory response; zymogen activation; protein binding; proteolysis	27.2 ppm
Klk3	Glandular kallikrein-3, submandibular	✓	✓	(+) 4.2170	proteolysis; androgen receptor signalling pathway	33.9 ppm
RGD1306750	Gliadoralin-A	✓	✓		oral mucosa protection	Data not found
Prkcsh	Glucosidase 2 subunit beta	✓			protein folding; glycoprotein processing; cellular homeostasis	910 ppm
Gfpt1	Glutamine--fructose-6-phosphate aminotransferase [isomerizing] 1	✓	✓		glycosylation; cellular stress responses; insulin signalling	3594 ppm
Qars	Glutamine--tRNA ligase	✓			aminoacylation; metabolism; translation	345 ppm
Eprs	Glutamyl-prolyl-tRNA synthetase	✓			incorporation of amino acids into proteins; inflammation	794 ppm
Gstm2	Glutathione S-transferase Mu 2	✓	✓		metabolism; regulation of oxidative stress	900 ppm
Gstp1	Glutathione S-transferase P	✓			metabolism; regulation of oxidative stress	43.6 ppm
Gapdh	Glyceraldehyde-3-phosphate dehydrogenase	✓	✓	(=) 1.1600	glycolysis; energy production; DNA repair; apoptosis	1043 ppm
Gpd1l	Glycerol-3-phosphate dehydrogenase [NAD(+)]	✓	✓		glycolysis; lipid metabolism; NAD metabolic process	652 ppm
Pygb	Glycogen phosphorylase, brain form	✓	✓		energy metabolism; glycogen breakdown	230 ppm
Gda	Guanine deaminase		✓		control of inflammation; cellular nucleotide regulation	37.1 ppm
Gnb2l1	Guanine nucleotide-binding protein subunit beta-2-like 1	✓	✓	(-) 0.6418	cell cycle regulation; signal transduction; apoptosis	2631 ppm
H1f0	H1 histone family, member 0	✓			DNA replication and transcription; cell development and differentiation	75.3 ppm
H1f2	H1.2 linker histone, cluster member	✓	✓	(-) 0.5536	DNA replication and transcription; cell development and differentiation	Data not found
Hspa8	Heat shock cognate 71 kDa protein	✓	✓	(=) 1.0847	protein folding and transport; response to heat; ATP metabolic process	4811 ppm
Hsp90aa1	Heat shock protein HSP 90-alpha	✓			protein folding and transport; response to heat; ATP metabolic process	4057 ppm
Hsp90ab1	Heat shock protein HSP 90-beta	✓	✓	(+) 1.4393	protein folding and transport; response to heat; ATP metabolic process	2884 ppm
Hba1	Hemoglobin subunit alpha-1/2	✓	✓	(-) 0.3058	oxygen transport; heme and iron ion binding; regulation of blood pressure	8998 ppm
Hbb	Hemoglobin subunit beta-1	✓	✓	(=) 0.7723	oxygen transport; heme and iron ion binding; regulation of blood pressure	9172 ppm
HBB2	Hemoglobin subunit beta-2	✓	✓	(=) 1.2784	oxygen transport; heme and iron ion binding; regulation of blood pressure	9172 ppm
Hpx	Hemopexin	✓			heme binding and metabolism regulation; oxidative stress	426 ppm
Hnrnpk	Heterogeneous nuclear ribonucleoprotein K	✓	✓	(=) 1.0153	RNA splicing; transcriptional regulation; mRNA stabilization; translation	443 ppm
Hist2h2aa3	Histone H2A type 2-A	✓	✓	(-) 0.4991	DNA organization and damage response; cell division; gene expression	8.78 ppm
Hist1h2bk	Histone H2B	✓	✓	(-) 0.2532	DNA organization and damage response; cell division; gene expression	21.5 ppm
H3f3c	Histone H3	✓	✓		DNA organization and damage response; cell division; gene expression	749 ppm
Hist1h4b	Histone H4	✓	✓	(-) 0.1675	DNA organization and damage response; cell division; gene expression	Data not found
Hadh	Hydroxyacyl-coenzyme A dehydrogenase, mitochondrial	✓			metabolism of fatty acids; energy production; lipid homeostasis	1003 ppm
Hyou1	Hypoxia up-regulated protein 1	✓			regulation of the unfolded protein response; endoplasmic reticulum stress	1093 ppm
IgG-2a	Ig gamma-2A chain C region	✓	✓	(=) 0.7560	antigen and immunoglobulin receptor binding	1093 ppm
LOC500183	Ig kappa chain C region, B allele;Ig kappa chain C region, A allele	✓			antigen and immunoglobulin receptor binding	Data not found
ENSRNOP00000041697	Ig-like domain-containing protein	✓			antigen and immunoglobulin receptor binding	Data not found
Ighm	Immunoglobulin heavy constant epsilon	✓	✓		antigen and immunoglobulin receptor binding	Data not found
Itga6	Integrin, alpha 6, isoform CRA_a	✓			cell adhesion, migration and signalling	171 ppm
Iqgap1	IQ motif containing GTPase activating protein 1	✓			cell adhesion; cytoskeletal reorganization; cytokinesis	210 ppm
Iqgap2	IQ motif containing GTPase activating protein 2	✓			cell adhesion; cytoskeletal reorganization; cytokinesis	1214 ppm
Idh2	Isocitrate dehydrogenase [NADP], mitochondrial	✓	✓	(=) 0.7457	metabolism; biosynthesis of amino acids, fatty acids and nucleotides	2568 ppm
Ivd	Isovaleryl-CoA dehydrogenase, mitochondrial	✓			branched-chain amino acids metabolism	559 ppm
Klk1	Kallikrein-1	✓	✓	(=) 0.9114	inflammatory response; prostate cancer biomarker; zymogen activation	23184 ppm
Klk2	Kallikrein-2	✓	✓	(=) 0.7263	inflammatory response; prostate cancer biomarker; zymogen activation	Data not found
Klk7	Kallikrein-7	✓	✓	(-) 0.6909	inflammatory response; cancer progression; zymogen activation	Data not found
Krt14	Keratin, type I cytoskeletal 14	✓			cellular organization and adhesion; aging; response to inorganic substance	252 ppm
Krt18	Keratin, type I cytoskeletal 18	✓	✓	(=) 0.8660	cell signalling; gene expression; response to nutrient levels; apoptosis	Data not found
Krt19	Keratin, type I cytoskeletal 19	✓	✓		cell signalling; gene expression; response to nutrient levels; apoptosis	Data not found
Krt8	Keratin, type II cytoskeletal 8	✓	✓	(=) 0.7125	cellular organization and adhesion; apoptosis; cytoskeleton formation	11215 ppm
Kif5a	Kinesin heavy chain isoform 5A	✓			axon transport; mitosis; intracellular transport; protein synthesis	0 ppm
Ldha	Lactate dehydrogenase A	✓	✓	(+) 2.2976	conversion of pyruvate to lactate; energy metabolism; glucose homeostasis	4550 ppm
Ldhb	Lactate dehydrogenase B	✓	✓		conversion of pyruvate to lactate; energy metabolism; glucose homeostasis	1235 ppm
Lpo	Lactoperoxidase		✓		defense response; oxidative stress	185 ppm
Lamb2	Laminin subunit beta-2	✓	✓		neuron projection development; cell adhesion and differentiation	17.3 ppm
Lamc1	Laminin subunit gamma 1	✓	✓		neuron projection development; cell adhesion and differentiation	126 ppm
Lman1	Lectin, mannose-binding	✓	✓	(-) 0.6543	vesicle-mediated transport; cell adhesion; protein folding	481 ppm
Lman2	Lectin, mannose-binding 2	✓	✓		vesicle-mediated transport; cell adhesion; protein folding	88.1 ppm
Lta4h	Leukotriene A-4 hydrolase	✓			lipid and fatty acid metabolism; immune response; inflammation	878 ppm
Capg	Macrophage-capping protein	✓	✓	(+) 1.4192	actin cytoskeleton organization; phagocytosis; protein polymerization	69.8 ppm
Mdh1	Malate dehydrogenase, cytoplasmic	✓	✓	(=) 1.0103	acetyl-CoA metabolism	5825 ppm
Mdh2	Malate dehydrogenase, mitochondrial	✓	✓	(-) 0.4300	acetyl-CoA metabolism	1982 ppm
Aldh6a1	Methylmalonate-semialdehyde dehydrogenase [acylating], mitochondrial	✓	✓		fatty-acyl-CoA binding; valine metabolism	2385 ppm
Immt	MICOS complex subunit Mic60	✓	✓		cation homeostasis; response to temperature stimulus	809 ppm
Aldh2	Mitochondrial aldehyde dehydrogenase 2	✓	✓	(=) 0.7088	regulation of mitochondrial function and oxidative stress; ATP production	1994 ppm
Muc19	Mucin apoprotein 19	✓	✓		protection; lubrication; secretion	Data not found
Mug1	Murinoglobulin-1		✓		acute inflammatory response; cell proliferation and differentiation	20 ppm
Mug2	Murinoglobulin-2	✓	✓	(-) 0.4651	acute inflammatory response; cell proliferation and differentiation	0 ppm
Myl6	Myosin light polypeptide 6	✓			calcium ion binding; actin filament-based movement; tissue development	1365 ppm
Myh11	Myosin-11	✓	✓		cell migration; cytokinesis	3275 ppm
Myh9	Myosin-9	✓			cell migration; cytokinesis	2701 ppm
Nans	N-acetylneuraminate synthase	✓			cell interactions; immune responses; sialic acid biosynthesis	3101 ppm
Cmas	N-acylneuraminate cytidylyltransferase	✓	✓		cell interactions; immune responses; sialic acid biosynthesis	1701 ppm
Ndufs1	NADH-ubiquinone oxidoreductase 75 kDa subunit, mitochondrial	✓	✓		apoptotic mitochondrial changes; ATP synthesis coupled electron transport	1403 ppm
Ndufa4	NDUFA4, mitochondrial complex-associated	✓	✓		electron transport chain; synthesis of ATP	1403 ppm
Nnt	Nicotinamide nucleotide transhydrogenase	✓	✓		ion transport; cell redox homeostasis	327 ppm
Nme1	Nucleoside diphosphate kinase A	✓	✓		response to testosterone; phosphorylation; endocytosis; lactation	2927 ppm
Ppib	Peptidyl-prolyl cis-trans isomerase B	✓	✓		chaperone-mediated protein folding; protein stabilization; nuclear transport	7593 ppm
Ppia	Peptidylprolyl isomerase A	✓	✓		protein folding and transport; signalling pathways	3709 ppm
Hspg2	Perlecan	✓	✓		cell adhesion and differentiation; growth factors regulation	192 ppm
Prdx1	Peroxiredoxin-1	✓	✓		modulation of protein activity; modulation of protein activity	4521 ppm
Prdx2	Peroxiredoxin-2	✓	✓		modulation of protein activity; modulation of protein activity	977 ppm
Prdx5	Peroxiredoxin-5, mitochondrial	✓	✓		modulation of protein activity; modulation of protein activity	1817 ppm
Pebp1	Phosphatidylethanolamine-binding protein 1	✓	✓		cell proliferation, apoptosis, motility and differentiation; aging	835 ppm
Pgm3	Phosphoacetylglucosamine mutase	✓			amino sugar biosynthetic process; carbohydrate metabolic process	94.8 ppm
Pgk1	Phosphoglycerate kinase 1	✓	✓		carbohydrate biosynthetic process and metabolism	3883 ppm
Pmm2	Phosphomannomutase 2	✓			carbohydrate biosynthetic process and metabolism	1220 ppm
Plec	Plectin		✓		carbohydrate metabolism; glycan biosynthesis; cell differentiation	762 ppm
Pcbp1	Poly(rC) binding protein 1	✓	✓		RNA stability and turnover; mRNA translation; alternative splicing	Data not found
Pcbp3	Poly(rC) binding protein 3		✓		RNA stability and turnover; mRNA translation; alternative splicing	Data not found
Lmna	Prelamin-A/C	✓			protein stability regulation; protein import into nucleus; nucleus organization	3507 ppm
Phb	Prohibitin-1	✓	✓		gene expression; cell proliferation; apoptosis; mitochondrial function	414 ppm
Phb2	Prohibitin-2	✓	✓		gene expression; cell proliferation; apoptosis; mitochondrial function	285 ppm
Pip	Prolactin-inducible protein homolog	✓	✓	(=) 0.7738	autophagy; immune response; proteolysis	0 ppm
Prelp	Prolargin	✓	✓		cellular senescence; tissue remodeling; aging	250 ppm
Pa2g4	Proliferation-associated protein 2G4	✓			cell proliferation, differentiation and migration	1197 ppm
Prol1	Proline rich, lacrimal 1	✓	✓	(+) 2.8960	tears production; lubrification; tissue repair	Data not found
Pcca	Propionyl-CoA carboxylase alpha chain, mitochondrial	✓			amino acids, fatty acids, and cholesterol catabolism; lipid synthesis	1159 ppm
Pccb	Propionyl-CoA carboxylase beta chain, mitochondrial	✓	✓		amino acids, fatty acids, and cholesterol catabolism; lipid synthesis	172 ppm
Klk6	Prostatic glandular kallikrein-6	✓	✓	(-) 0.5583	regulation of inflammation and immune responses; zymogen activation	78.2 ppm
Psma3	Proteasome subunit alpha type-3	✓			regulation of protein turnover; cell cycle progression	440 ppm
Park7	Protein deglycase DJ-1	✓	✓	(=) 0.7670	protein degradation; oxidative stress response; mitochondrial function	1055 ppm
P4hb	Protein disulfide-isomerase	✓	✓	(-) 0.5107	isomerization of disulfide bonds; protein folding and maturation	25618 ppm
Pdia3	Protein disulfide-isomerase A3	✓	✓	(-) 0.3650	protein folding; endoplasmic reticulum stress response; redox signalling	8839 ppm
Pdia4	Protein disulfide-isomerase A4	✓	✓		protein folding; endoplasmic reticulum stress response; redox signalling	4927 ppm
Pdia5	Protein disulfide-isomerase A5	✓			protein folding; endoplasmic reticulum stress response; redox signalling	168 ppm
Pdia6	Protein disulfide-isomerase A6	✓			protein folding; endoplasmic reticulum stress response; redox signalling	254 ppm
Sec31a	Protein transport protein Sec31A	✓	✓		protein transport; vesicle-mediated transport	727 ppm
Pdhb	Pyruvate dehydrogenase E1 component subunit beta, mitochondrial	✓	✓		acetyl-CoA biosynthetic and metabolism	872 ppm
Pkm	Pyruvate kinase PKM	✓	✓		glucose metabolism	1817 ppm
Gdi1	Rab GDP dissociation inhibitor alpha	✓	✓		Rab GTPases regulation; neuronal development, synaptic transmission	219 ppm
Gdi2	Rab GDP dissociation inhibitor beta	✓	✓		Rab GTPases regulation; neuronal development, synaptic transmission	2289 ppm
Rac1	Ras-related C3 botulinum toxin substrate 1	✓			actin cytoskeleton organization; cell migration and proliferation	70.4 ppm
Rab1A	Ras-related protein Rab-1A	✓	✓		proteins transport from the endoplasmic reticulum to the Golgi apparatus	23.1 ppm
Rab2a	Ras-related protein Rab-2A		✓		proteins transport from the endoplasmic reticulum to the Golgi apparatus	230 ppm
Rap1b	Ras-related protein Rap-1b	✓			proteins transport from the endoplasmic reticulum to the Golgi apparatus	227 ppm
Fam65b	Rho family-interacting cell polarization regulator 2	✓			cell polarization and migration; actin filaments formation;	Data not found
Rrbp1	Ribosome-binding protein 1	✓	✓		protein synthesis and intracellular transport; ribosomes assembly	1490 ppm
Atp2a2	Sarcoplasmic/endoplasmic reticulum calcium ATPase 2	✓	✓		calcium homeostasis and transport; apoptosis	220 ppm
Atp2a3	Sarcoplasmic/endoplasmic reticulum calcium ATPase 3	✓	✓	(+) 1.5537	calcium homeostasis and transport; apoptosis	257 ppm
Cpped1	Serine/threonine-protein phosphatase CPPED1	✓			blocking cell cycle progression and promoting cell apoptosis	9.74 ppm
Tf	Serotransferrin	✓	✓	(-) 0.4991	acute inflammatory response; apoptosis; cation homeostasis	2213 ppm
Serpinb6	Serpin peptidase inhibitor, clade B, member 6	✓	✓	(=) 0.7100	proteolysis; cell proliferation	1148 ppm
Alb	Serum albumin	✓	✓	(-) 0.4782	maintenance of osmotic pressure; molecules transport; antioxidant activity	27125 ppm
Pon3	Serum paraoxonase/lactonase 3	✓	✓		lipid metabolism; antioxidant activity; detoxification	39.2 ppm
LOC684828	Similar to Histone H1.2	✓	✓		cellular and chromatin organization; protein-DNA complex assembly	Data not found
Atp1a1	Sodium/potassium-transporting ATPase subunit alpha-1	✓	✓	(+) 1.5723	ATP hydrolysis coupled proton transport; calcium and sodium signalling	2156 ppm
Atp1b1	Sodium/potassium-transporting ATPase subunit beta-1	✓	✓	(=) 1.1219	ATP hydrolysis coupled proton transport; calcium and sodium signalling	974 ppm
Slc12a2	Solute carrier family 12 member 2	✓	✓	(=) 1.0675	transport; osmotic regulation; aging	113 ppm
Sri	Sorcin	✓			fibers contraction and relaxation; cell proliferation; ion channels regulation	8.92 ppm
Sptan1	Spectrin alpha chain, non-erythrocytic 1	✓			cell adhesion and migration; axon guidance; neuron development	3767 ppm
Sptbn1	Spectrin beta chain, non-erythrocytic 1	✓			cell adhesion and migration; axon guidance; neuron development	633 ppm
Snd1	Staphylococcal nuclease domain-containing protein 1	✓	✓		RNA metabolism; transcription regulation; cell growth	2878 ppm
Stard10	StAR-related lipid transfer (START) domain containing 10	✓	✓		acid secretion; lipid metabolism; cell proliferation; insulin signalling	36.2 ppm
Hspa9	Stress-70 protein, mitochondrial	✓	✓		folding and assembly of proteins; mitochondrial metabolism regulation	2643 ppm
Klk9	Submandibular glandular kallikrein-9	✓	✓	(=) 0.8797	electrolyte balance; modulation of immune responses; vasoconstriction	678 ppm
Sdha	Succinate dehydrogenase [ubiquinone] flavoprotein subunit, mitochondrial	✓			acetyl-CoA metabolism; carboxylic acid metabolism	1629 ppm
Suclg1	Succinyl-CoA ligase [ADP/GDP-forming] subunit alpha, mitochondrial	✓	✓		acetyl-CoA metabolism; carboxylic acid metabolism	52.5 ppm
Sqrdl	Sulfide Quinone Oxidoreductase	✓			cellular respiration; redox homeostasis; energy metabolism	15.1 ppm
Sod1	Superoxide dismutase [Cu-Zn]	✓	✓		prevention of lipid peroxidation; regeneration	716 ppm
Sod2	Superoxide dismutase [Mn], mitochondrial	✓			age-dependent response to oxidative stress	5216 ppm
Vat1	Synaptic vesicle membrane protein VAT-1 homolog	✓	✓		neurotransmitters regulation; synaptic vesicle transport and exocytosis	611 ppm
Stx7	Syntaxin-7	✓			transport; autophagy; endocytosi; exocytosis	12.6 ppm
Tln1	Talin 1	✓			actin cytoskeleton regulation; cell signalling, division and differentiation	1223 ppm
Taldo1	Transaldolase	✓	✓	(=) 0.7815	glucose metabolism; pentose phosphate pathway	4202 ppm
Tagln	Transgelin	✓			cell motility; cytoskeleton organization; signal transduction	2049 ppm
Tgm2	Transglutaminase 2	✓	✓	(+) 1.3548	inflammation; apoptosis; cell adhesion and migration	533 ppm
Vcp	Transitional endoplasmic reticulum ATPase	✓	✓	(+) 1.3005	protein folding; calcium homeostasis; lipid metabolism	2142 ppm
Tkt	Transketolase	✓	✓	(=) 1.1435	carbohydrates metabolism; pentose sugars production	3246 ppm
Tm9sf2	Transmembrane 9 superfamily member 2	✓			transport; cholesterol regulation; lipid metabolism	238 ppm
Hadha	Trifunctional enzyme subunit alpha, mitochondrial	✓	✓		fatty acid metabolism; ketone bodies biosynthesis	1101 ppm
Hadhb	Trifunctional enzyme subunit beta, mitochondrial	✓	✓		fatty acid metabolism; ketone bodies biosynthesis	1130 ppm
Tpi1	Triosephosphate isomerase	✓	✓	(=) 0.9777	glycolysis; gluconeogenesis; Calvin cycle	7767 ppm
Tuba4a	Tubulin alpha-4A chain	✓			Cell division; neuronal development; intracellular transport	913 ppm
Tubb2a	Tubulin beta-2A chain	✓	✓		Cell division; neuronal development; intracellular transport	15.4 ppm
Krt16	Type I keratin KA11	✓			intermediate filaments formation; cell differentiation and proliferation	Data not found
Krt83	Type ii keratin	✓			epidermal development; wound healing; keratinocytes proliferation	Data not found
Ubb	Ubiquitin	✓	✓	(=) 0.7276	protein degradation; DNA repair; cell cycle regulation	Data not found
Uba1	Ubiquitin-like modifier-activating enzyme 1	✓	✓		cellular homeostasis; autophagy; gene expression; DNA repair	893 ppm
Uap1	UDP-N-acetilhexosamina pirofosforilase	✓	✓		glycoproteins and glycolipids biosynthesis	371 ppm
Vars	Valine--tRNA ligase	✓			protein synthesis; translation	41.4 ppm
Vim	Vimentin	✓			cellular stress responses; cell motility, signalling and adhesion	745 ppm
Vdac1	Voltage-dependent anion-selective channel protein 1	✓	✓		apoptosis; transport	867 ppm
Vdac2	Voltage-dependent anion-selective channel protein 2	✓	✓	(=) 0.9306	apoptosis; transport	603 ppm
Wdr1	WD repeat-containing protein 1	✓	✓		actin cytoskeleton organization; cell migration and adhesion; endocytosis	982 ppm
* Proteins were considered by the cut-off of 1.3 for the TEST/CTRL ratio. Legend: (-) represents down-regulated proteins (with fold change TEST/CTRL < 0.7); (=) represents proteins with no considerable expression (fold change TEST/CTRL [0.7-1.3]); (+) represents up-regulated proteins (fold change TEST/CTRL > 1.3)
